# Supplementary material for: Ammonia borane dehydrogenation and selective hydrogenation of functionalized nitroarene over a porous nickel–cobalt bimetallic catalyst
Source: Royal Society of Chemistry journal article supplement (doi:10.1039/c9ra01551e), 2019-01-01
Supplement: c9ra01551e1.pdf [file c9ra01551e1.pdf]

## Supporting Information

### Ammonia Borane Dehydrogenation and Selective Hydrogenation of Functionalized Nitroarene over Porous Nickel-Cobalt Bimetallic Catalyst

Hui Miao,<sup>\*a</sup> Kelong Ma,<sup>a</sup> Huiru Zhu,<sup>a</sup> Kun Yin,<sup>a</sup> Ying Zhang<sup>a</sup> and Yumin Cui<sup>a</sup>

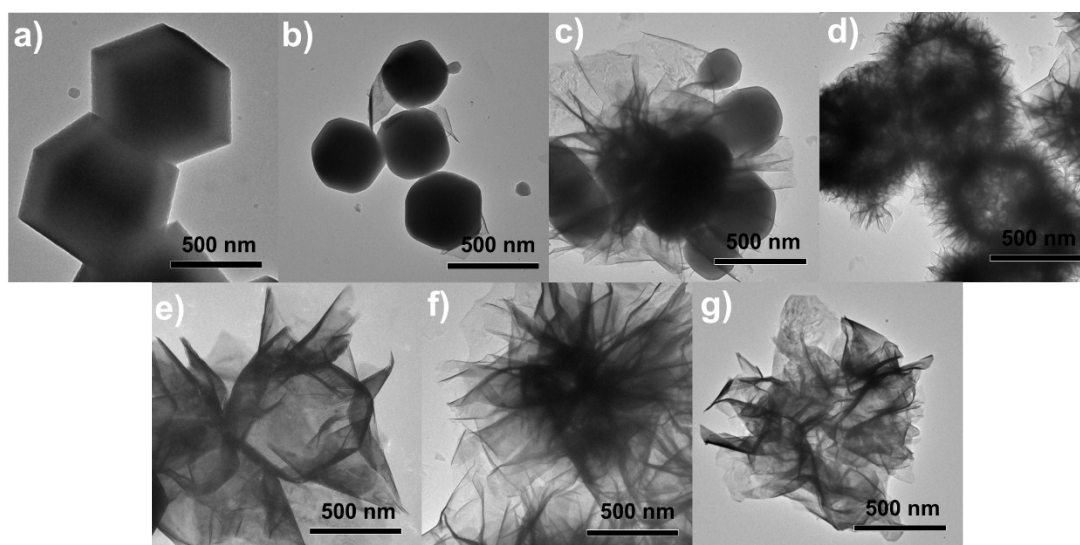

Figure S1. TEM images of Ni-ZIF-67 with different Ni:Co ratio, a) 1:8, b) 1:7, c) 1:6, d) 1:5, e) 1:4, f) 1:3, g) 1:2.

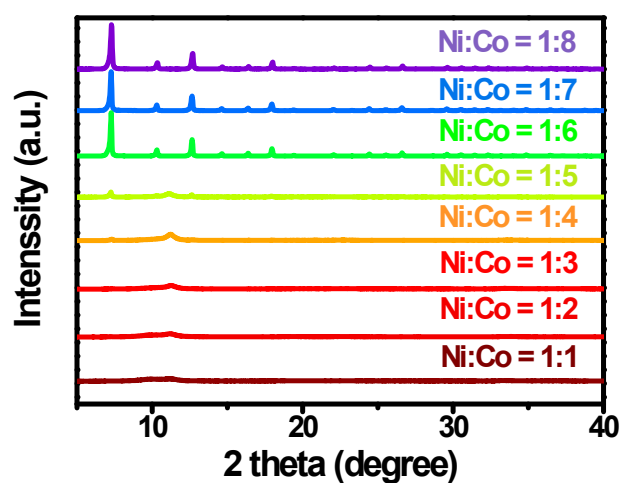

Figure S2. The XRD patterns of the samples resulting from introduction of  $\text{Ni}(\text{NO}_3)_2$  to ZIF-67 with gradually increasing amount.

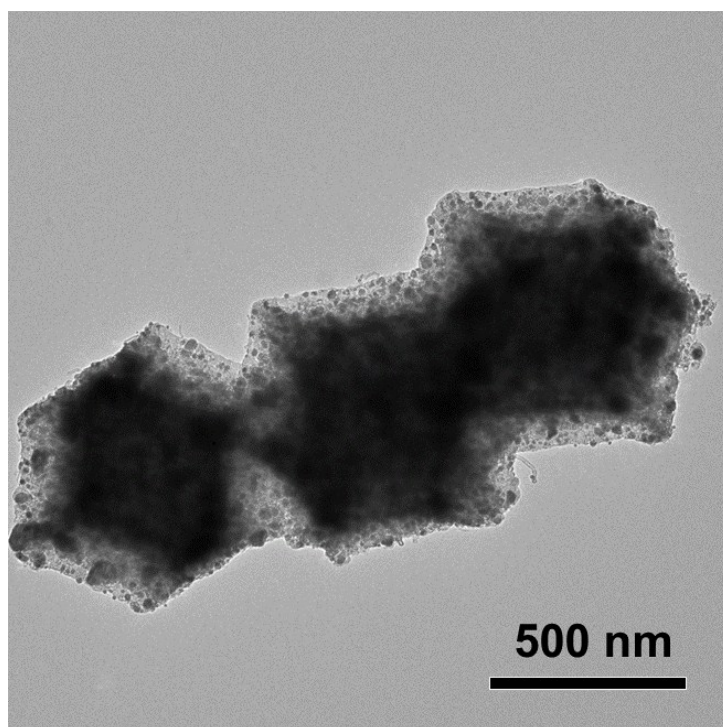

**Figure S3.** TEM image of Co-N-C derived from pyrolysis of ZIF-67 at 800 °C under nitrogen atmosphere.

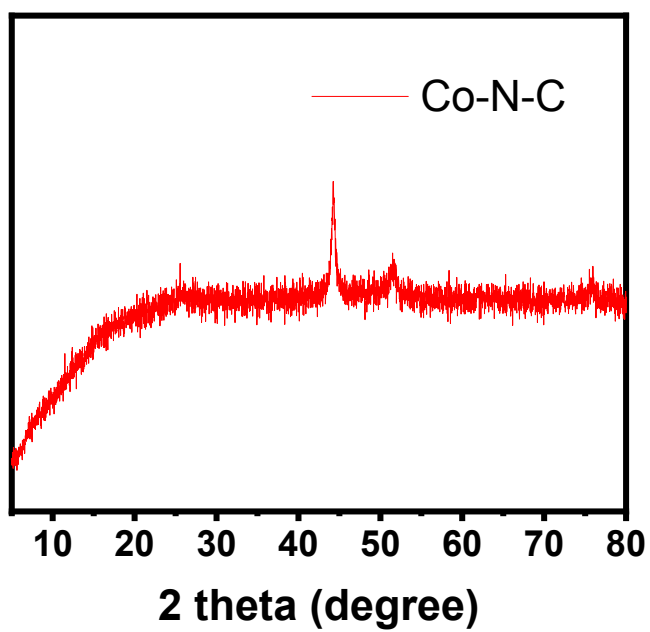

**Figure S4.** XRD patterns of Co-N-C derived from pyrolysis of ZIF-67 at 800 °C under nitrogen atmosphere.

**Table S1.** The comparison of bimetallic NiCo porous catalyst with other reported catalysts in nitrobenzene hydrogenation reaction.

| Entry    | Catalyst                                       | Hydrogen source                                                       | Conditions                           | Yields     | Ref.                                 |
|----------|------------------------------------------------|-----------------------------------------------------------------------|--------------------------------------|------------|--------------------------------------|
| <b>1</b> | <b>NiCo (ZIF-67)</b>                           | <b>AB dehydrogenation</b>                                             | <b>2 h, 25 °C,</b>                   | <b>100</b> | <b>Our work</b>                      |
| 2        | Co/CoO (ZIF-67)                                | AB dehydrogenation                                                    | 1.5 h, 25 °C, MeOH, H <sub>2</sub> O | 100        | Chem. Commun., 2016, 52, 7719        |
| 3        | Co <sub>3</sub> S <sub>4</sub> (ZIF-67)        | Na <sub>2</sub> S, Na <sub>2</sub> SO <sub>3</sub> + H <sub>2</sub> O | 2.5 h, 25 °C, H <sub>2</sub> O       | 99.8       | Catal. Commun. 2017, 101, 31         |
| 4        | Single atom Co (ZIF-8/ZIF-67)                  | H <sub>2</sub>                                                        | 4.5 h, 110 °C, 3 MPa                 | 100        | Journal of Catalysis 357 (2018) 20   |
| 5        | Co nanoparticles (ZIF-67)                      | H <sub>2</sub>                                                        | 3 h, 100 °C, 1 MPa                   | 99         | J. Mol. Catal. A-Chem. 2016, 420, 56 |
| 6        | Co <sub>2</sub> P (ZIF-67)                     | H <sub>2</sub>                                                        | 6 h, 60 °C, 5 MPa                    | 99         | Chem. Eur. J. 2018, 24, 4234         |
| 7        | Co@Pd/CN (ZIF-67)                              | H <sub>2</sub>                                                        | 45 min, 25 °C, 1atm                  | 99         | ACS Catal. 2015, 5, 5264             |
| 8        | Co@C-N (ZIF-67)                                | Isopropanol                                                           | 80 h, 80 °C                          | 80         | Chem. Commun., 2015, 51, 2331        |
| 9        | γ-Fe <sub>2</sub> O <sub>3</sub> (Fe-MIL-88A.) | N <sub>2</sub> H <sub>4</sub> ·H <sub>2</sub> O                       | 1 h, 85 °C                           | 100        | Chem. Commun., 2016, 52, 4199        |
| 10       | Fe/Fe <sub>2</sub> O <sub>3</sub> (Fe-MIL-101) | N <sub>2</sub> H <sub>4</sub> ·H <sub>2</sub> O                       | 0.3h, 40 °C                          | 100        | ChemCatChem 2019, 11, 724            |
